# Supplementary material for: Influence of Host and Geographic Locale on the Distribution of Colletotrichum cereale Lineages
Source: PLoS One. 2014 May 19;9(5):e97706. doi: 10.1371/journal.pone.0097706 (PMC4026525; doi:10.1371/journal.pone.0097706)
Supplement: Table S5 — Herbarium specimens of Colletotrichum cereale tested to determine clade membership (A or B) using real-time PCR assays. CT = cycle threshold. aIsolate was diagnosed as belonging to clade A following visual inspection of amplification curves. Low fluorescence intensity and late CT values (>40.0) was observed for this sample when tested using the B-Apn2 assay. bSequence anaylsis of the amplicon generated confirmed the presence of both genotypes in these samples (data not shown). cVisualization of the real-time PCR product through gel electrophoresis and the amplification product of conventional PCR reactions performed using the primers alone on the fungarium specimens yielded no detectable amplicons. (XLS) [file pone.0097706.s005.xls]

## Sheet: Sheet1
Table S5. Herbarium Specimens of Colletotrichum cereale tested to determine clade membership (A or B) using real-time PCR assays. CT=cycle threshold.
	Average CT	Average CT			Collection	Year
BPI number	Clade A assay	Clade B assay	Diagnosis	Host	Location	Collected
Colletotrichum cereale
BPI 397238	35.78	-	A	Agropyron repens	Pennsylvania	1924
BPI 397243	38.73	-	A	Anthoxanthum odoratum	Pennsylvania	1924
BPI 397246	38.24	-	A	Arrhenatherum elatius	Ohio	1908
BPI 397247	30.74	-	A	Avena sativa	Minnesota	1919
BPI 397248	30.48	-	A	Avena sativa	Minnesota	1919
BPI 397249	33.41	-	A	Avena sativa	Minnesota	1919
BPI 397253	36.79	-	A	Avena sativa	Ohio	1908
BPI 397254	34.4	-	A	Avena sativa	Ohio	1908
BPI 397255	35.38	-	A	Avena sativa	Ohio	1922
BPI 397256	32.8	-	A	Avena sativa	Ohio	1908
BPI 397257	36.01	-	A	Bromus rigidus	California	1938
BPI 397258	33.1	-	A	Bromus rigidus	California	1938
BPI 397259	39.58	-	A	Bromus secalinus	Ohio	1908
BPI 397260	39.09		A	Bromus secalinus	Ohio	1908
BPI 397261	35.36	-	A	Bromus secalinus	Ohio	1908
BPI 397262	34.47	-	A	Bromus secalinus	Ohio	1908
BPI 397264	36.84	-	A	Calamagrostis epigeios	China	1930
BPI 397273	34.53	-	A	Holcus lanatus	Pennsylvania	1924
BPI 397274	34.29	-	A	Hordeum vulgare	Minnesota	1919
BPI 397275	37.15	-	A	Hordeum jubatum	Pennsylvania	1924
BPI 397287	34.22		A	Secale cereale	Illinois	1919
BPI 397288	38	-	A	Secale cereale	Tennessee	1919
BPI 397289	28.2	-	A	Secale cereale	Kentucky	1919
BPI 397291	33.48	-	A	Secale cereale	Ohio	1908
BPI 397292	35.51	-	A	Secale cereale	Ohio	1908
BPI 397293	39.36	-	A	Secale cereale	Oklahoma	?
BPI 397295	35.75	-	A	Secale cereale	Indiana	1917
BPI 397297	38.17	-	A	Secale cereale	Ohio	1908
BPI 397298	37.05	-	A	Secale cereale	Ohio	1922
BPI 397299	37.36	-	A	Secale cereale	Ohio	1922
BPI 397301	34.77	-	A	Secale cereale	Ohio	1908
BPI 397302	35.16	-	A	Secale cereale	New York	1909
BPI 397303	33.75	-	A	Secale cereale	Mississippi	1922
BPI 397304	37.94	-	A	Secale cereale	Missouri	1918
BPI 397307	33.5	-	A	Secale cereale	Missouri	1918
BPI 397308	38.58	-	A	Secale cereale	Missouri	1918
BPI 397309	34.04	-	A	Triticum aestivum	Minnesota	1916
BPI 397311	31.3	-	A	Triticum aestivum	Ohio	1910
BPI 397313	34.02	-	A	Triticum aestivum	Minnesota	1919
BPI 397316	36.6	-	A	Triticum aestivum	New York	1919
BPI 397318	31.53	-	A	Triticum aestivum	Minnesota	1919
BPI 397319	37.27	-	A	Triticum aestivum	West Virginia	1919
BPI 397320	33.96	-	A	Triticum aestivum	Minnesota	1919
BPI 397321	33.05	-	A	Triticum aestivum	New York	1919
BPI 397322	33.27	-	A	Triticum aestivum	Minnesota	1919
BPI 397323	35.56		A	Triticum aestivum	Virginia	1919
BPI 397326	32.06	-	A	Triticum aestivum	New York	1919
BPI 397327	34.11	-	A	Triticum aestivum	Ohio	1922
BPI 397334	37.31	-	A	Triticum aestivum	Ohio	1908
BPI 845061	38.89	-	A	Avena sativa	Ohio	1908
BPI 845062	36.03	-	A	Avena sativa	Ohio	1908
BPI 845064	38.32	-	A	Triticum vulgare	Ohio	1908
BPI 845065	35.53	-	A	Triticum vulgare	Ohio	1908
BPI 845069	37.95	-	A	Secale cereale	Ohio	1908
BPI 864702	38.53		A	Agrostis alba	Ohio	1908
BPI 865217	33.87	-	A	Secale cereale	Pennsylvania	1920
BPI 865220	38.08	-	A	Poa pratensis	Ohio	1943
BPI 397239	38.11	-	Aa	Agrostis alba	Ohio	1908
BPI 397240	39.33	-	Aa	Agrostis alba	Ohio	1908
BPI 397242	37.5	-	Aa	Agrostis alba	Ohio	1908
BPI 397278	37.08	-	Aa	Phleum pratense	Pennsylvania	1924
BPI 397279	38.21	-	Aa	Phleum pratense	Ohio	1908
BPI 397324	33.65	-	Aa	Triticum aestivum	Minnesota	1919
BPI 397267	-	36.72	B	Dactylis glomerata	Ohio	1908
BPI 397269	-	37.98	B	Dactylis glomerata	Ohio	1908
BPI 397281	-	34.79	B	Phleum pratense	Ohio	1908
BPI 397284	-	39.09	B	Poa pratensis	Ohio	1908
BPI 397306	-	27.88	B	Secale cereale	Ohio	1908
BPI 845068	-	36.37	B	Phleum pratense	Ohio	1908
BPI 397245	39.28	39.76	bothb	Arrhenatherum elatius	Ohio	1908
BPI 397294	38.45	38.23	bothb	Secale cereale	Ohio	1908
BPI 397296	37.33	39.84	bothb	Secale cereale	Pennsylvania	1924
BPI 397300	37.42	38.03	bothb	Secale cereale	Ohio	1908
BPI 397317	35.95	39.75	bothb	Triticum aestivum	Missouri	1919
BPI 845063	36.76	38.91	bothb	Bromus secalinus	Ohio	1908
BPI 845067	36.33	39.41	bothb	Triticum vulgare	Ohio	1908
BPI 865219	37.75	37.79	bothb	Secale cereale	Pennsylvania	?
BPI 397241	-	-	No Ctc	Agrostis alba	Ohio	1908
BPI 397263	-	-	No Ctc	Bromus secalinus	Ohio	1908
BPI 397266	-	-	No Ctc	Dactylis glomerata	Ohio	1908
BPI 397268	-	-	No Ctc	Dactylis glomerata	Ohio	1908
BPI 397270	-	-	No Ctc	Dactylis glomerata	Ohio	1908
BPI 397272	-	-	No Ctc	Festuca rubra	Pennsylvania	1924
BPI 397283	-	-	No Ctc	Poa pratensis	Ohio	1908
BPI 397314	-	-	No Ctc	Triticum aestivum	Virginia	1919
BPI 397315	-	-	No Ctc	Triticum aestivum	Texas	1919
BPI 845066	-	-	No Ctc	Dactylis glomerata	Ohio	1908
Colletotrichum capsici
BPI 397265	-	-	No Ctc	Curcuma longa	India	1965
Colletotrichum sp.
BPI 397277	-	-	No Ctc	Malva rotundifolia	Ohio	1922
aIsolate was diagnosed as belonging to clade A following visual inspection of amplification curves. Low fluorescence intensity and late CT values (>40.0) was observed for this sample when tested using the B-Apn2 assay.
bSequence anaylsis of the amplicon generated confirmed the presence of both genotypes in these samples (data not shown)
cVisualization of the real-time PCR product through gel electrophoresis and the amplification product of conventional PCR reactions performed using the primers alone on the fungarium specimens yielded no detectable amplicons
